# Supplementary material for: Racial and ethnic disparities in diagnostic efficacy of comprehensive genetic testing for sensorineural hearing loss
Source: PubMed Central journal article supplement (PMC9035005; doi:10.1007/s00439-021-02338-4), 2021-09-13
Supplement: 439_2021_2338_MOESM4_ESM.pdf [file 439_2021_2338_MOESM4_ESM.pdf]

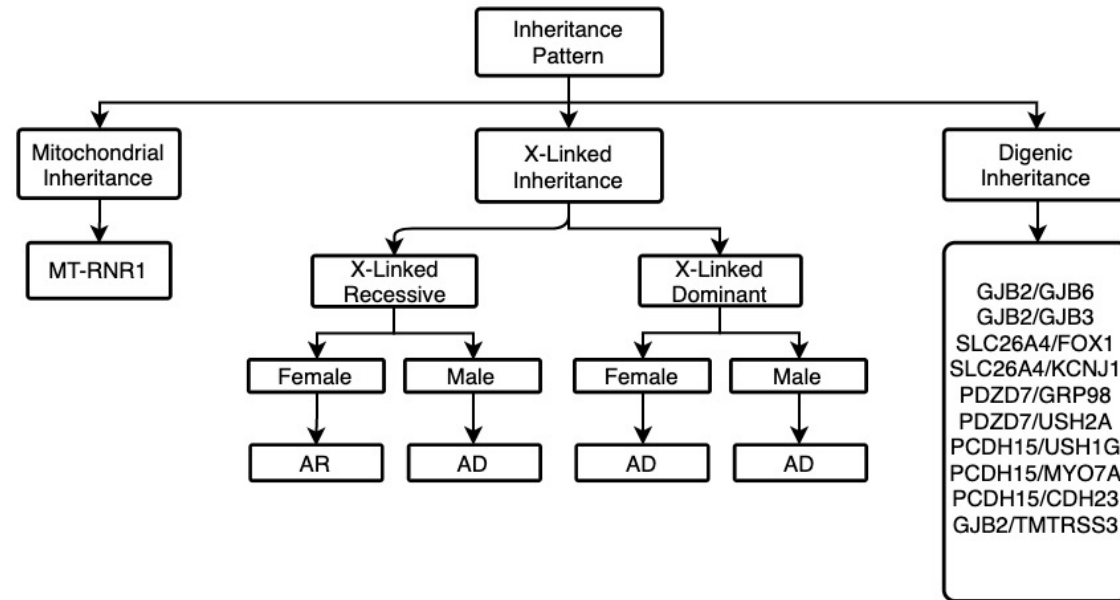

**Supplemental Figure 2. Complex Inheritance classification.** Algorithm for inheritance pattern for non-simple autosomal recessive/dominant genes. AD: Autosomal dominant; AR: Autosomal recessive.
